# Supplementary material for: An electrochemical immunosensor for prostate specific antigen using nitrogen-doped graphene as a sensing platform
Source: Royal Society of Chemistry journal article supplement (doi:10.1039/c9ay00064j), 2019-01-01
Supplement: c9ay00064j1.pdf [file c9ay00064j1.pdf]

1 **Electrochemical immunosensor of prostate specific antigen**  
2 **detection using nitrogen-doped graphene as sensing platform**

3

4 Wenwen Meng, Wenjuan Zhang, JunJun Zhang, Xi Chen, Yuzhong Zhang\*

5 *College of Chemistry and Materials Science, the Key Laboratory of Functional Molecular Solids, Ministry*

6 *of Education, Anhui Key Laboratory of Chem-Biosensing, Anhui Normal University, Wuhu 241000,*

7 *People's Republic of China*

8

9

10

11

12

13

14

15

16

17

18

---

19 \* Corresponding author. Tel.: +86 553 3869303; Fax: +86 553 3869303

20 E-mail address: [zhyz65@mail.ahnu.edu.cn](mailto:zhyz65@mail.ahnu.edu.cn) (Y. Zhang).

21  
22  
23  
24  
25  
26  
27  
28  
29  
30  
31  
32  
33  
34  
35  
36  
37  
38  
39  
40  
41  
42  
43  
44  
45  
46  
47  
48  
49

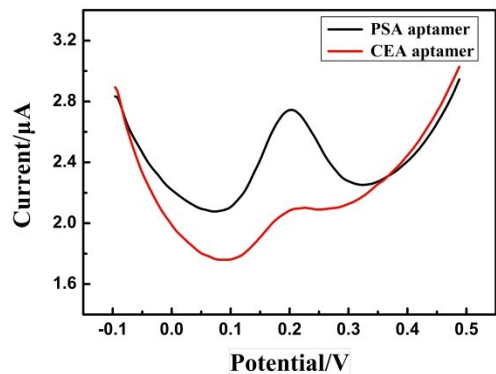

**Fig. S1** Investigation of two different aptamers for PSA recognition ability.

50

51

52

53

54

55

56

57

58

59

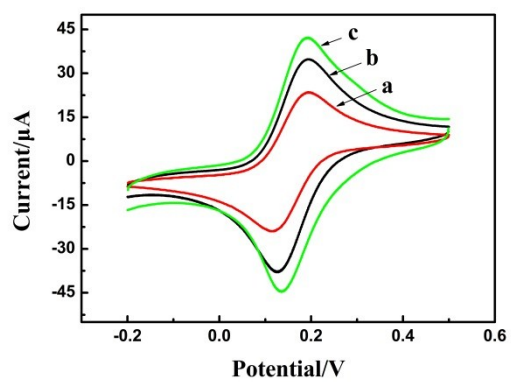

60 **Fig. S2** CVs of the immunosensor modified with different materials in 1.0 mM  $[\text{Fe}(\text{CN})_6]^{3-/4-}$  containing 0.1

61 M KCl. Curves:(a) GCE; (b) GO/GCE; (c) NG/GCE.

62

63

64

65

66

67

68

69

70

71

72

73

74

75

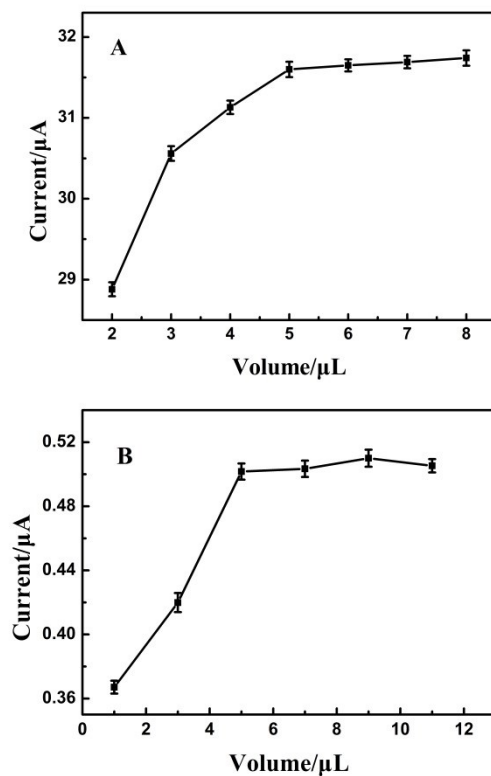

76 **Fig. S3** (A) The effect of amount of NG on the oxidation peak current of 1.0mM [Fe(CN)<sub>6</sub>]<sup>3-/4-</sup>; (B) The

77 effect of amount of signal probe on signal intensities of immunosensor. Conditions: C<sub>PSA</sub>=1.0 ng mL<sup>-1</sup>;

78 C<sub>aptamer</sub> = 1.0 μM; C<sub>NG</sub> =1.0 mg mL<sup>-1</sup>.

79

80

81

82

83

84

85

86

87

88

89

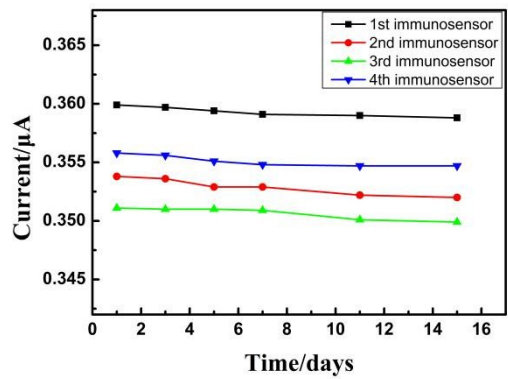

Fig. S4 Stability of immunosensor

90

91

92

**Table. S1** Analytical performances of various PSA assays.

| Detection method               | Recognition element            | Linear range<br>(ng mL <sup>-1</sup> ) | Detection limit<br>(ng mL <sup>-1</sup> ) | References |
|--------------------------------|--------------------------------|----------------------------------------|-------------------------------------------|------------|
| Electrochemical                | Biotinated aptamer             | 0.25 ~ 200                             | 0.25                                      | [7]        |
| Fluorescence                   | Dye-labeled aptamer            | 0.50 ~ 300                             | 0.2                                       | [25]       |
| Electrochemical                | Aptamer                        | 0.125 ~ 200                            | 0.05                                      | [28]       |
| Electrochemical                | Aminated aptamer               | 1 ~ 100                                | 1.0                                       | [44]       |
| Electrochemical                | Aptamer-MIP hybrid<br>receptor | 0.10 ~ 100                             | 0.001                                     | [45]       |
| Electrochemical                | Antibody                       | 0.05~50                                | 0.015                                     | [46]       |
| Electrochemical<br>immunoassay | Antibody                       | 0.01 ~ 10                              | 0.002                                     | [47]       |
| Chemiluminescence              | Dye-labeled aptamer            | 1.9 ~ 125                              | 1.0                                       | [48]       |
| Colorimetric assay             | PSA peptide                    | 0.1 ~ 100                              | 0.1                                       | [49]       |
| Surface plasmon<br>resonance   | Aptamer beacon                 | 0.1 ~ 50                               | 0.091                                     | [50]       |
| Electrochemical                | Aptamer                        | 1 ~ 300                                | 0.28                                      | [51]       |
| Electrochemical                | Antibody- Aptamer              | 0.05 ~ 100                             | 0.017                                     | This work  |

93

94

95

96

97

98

99

100

101

**Table. S2** Recovery results of PSA in serum samples using the proposed aptasensor

102

|   | Amount added<br>(ng mL <sup>-1</sup> ) | Amount detected <sup>a</sup><br>(ng mL <sup>-1</sup> ) | Recovery ( % ) | RSD ( % ) |
|---|----------------------------------------|--------------------------------------------------------|----------------|-----------|
| 1 | 0.10                                   | 0.099±0.006                                            | 99.0           | 6.06      |
| 2 | 0.50                                   | 0.507±0.030                                            | 101.4          | 5.92      |
| 3 | 1.00                                   | 0.968±0.050                                            | 96.8           | 5.17      |

103 <sup>a</sup>The average value ± standard deviation of five measurements

104
